# Supplementary material
Source: PubMed Central journal article supplement (PMC6150934)
Supplement: Supp_Fig1.pdf [file Supp_Fig1.pdf]

**Supplemental Figure 1.** CONSORT diagram of early care and education centers.

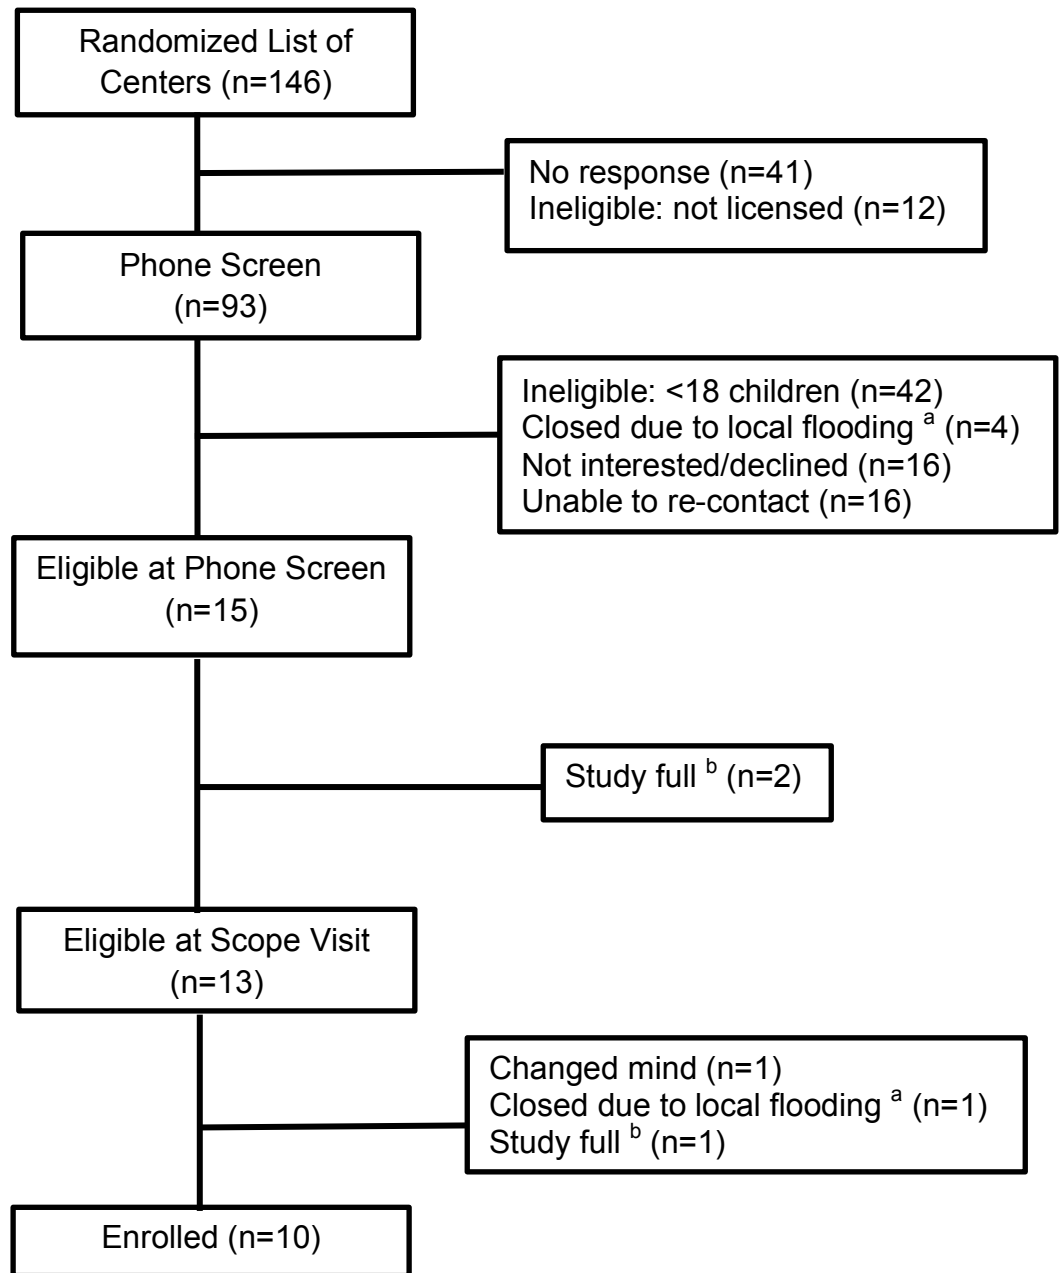

*Note.* <sup>a</sup> The local community experienced catastrophic flooding during the study enrollment period that caused many centers to shut down temporarily or permanently. <sup>b</sup> Extensive recruitment outreach was required to identify 10 eligible centers; a few centers were in the process of enrolling when the study was filled.
